# Interindividual variability and lateralization of $\mu$ -opioid receptors in the human brain

**Short title:** Individual differences in the  $\mu$ -opioid receptor system

Tatu Kantonen<sup>1</sup>, MD, Tomi Karjalainen<sup>1,2</sup>, DSc (Tech), Janne Isojärvi<sup>1</sup>, MSc, Pirjo Nuutila<sup>1,3</sup>, MD, PhD, Jouni Tuisku<sup>1</sup>, MSc, Juha Rinne<sup>1,4</sup>, MD, PhD, Jarmo Hietala<sup>1,5</sup>, MD, PhD, Valtteri Kaasinen<sup>1,4,6</sup>, MD, PhD, Kari Kalliokoski<sup>1</sup>, PhD, Harry Scheinin<sup>1</sup>, MD, PhD, Jussi Hirvonen<sup>1</sup>, MD, PhD, Aki Vehtari<sup>7</sup>, DSc (Tech), and Lauri Nummenmaa<sup>1,8</sup>, PhD

<sup>1</sup>*Turku PET Centre, University of Turku, Finland*

<sup>2</sup>*Turku PET Centre, Turku University Hospital, Finland*

<sup>3</sup>*Department of Endocrinology, Turku University Hospital, Finland*

<sup>4</sup>*Division of Clinical Neurosciences, Turku University Hospital, Finland*

<sup>5</sup>*Department of Psychiatry, University of Turku and Turku University Hospital, Finland*

<sup>6</sup>*Department of Neurology, University of Turku, Finland*

<sup>7</sup>*Helsinki Institute for Information Technology HIIT, Department of Computer Science, Aalto University, Finland*

<sup>8</sup>*Department of Psychology, University of Turku, Finland*

## Correspondence to:

Tatu Kantonen

Turku PET Centre c/o Turku University Hospital, P.O. Box 52

FI-20521 Turku, Finland

Email: [taskan@utu.fi](mailto:taskan@utu.fi)

ORCID ID: [orcid.org/0000-0002-2336-0426](https://orcid.org/0000-0002-2336-0426)

Tel: +358 (0)504911870

# *Individual differences in the $\mu$ -opioid receptor system*

## **Abstract**

The brain's  $\mu$ -opioid receptors (MORs) are involved in analgesia, reward and mood regulation. Several neuropsychiatric diseases have been associated with dysfunctional MOR system, and there is also considerable variation in receptor density among healthy individuals. Sex, age, body mass and smoking have been proposed to influence the MOR system, but due to small sample sizes the magnitude of their influence remains inconclusive. Here we quantified *in vivo* MOR availability in the brains of 204 individuals with no neurologic or psychiatric disorders using positron emission tomography (PET) with tracer [ $^{11}\text{C}$ ]carfentanil. We then used Bayesian hierarchical modeling to estimate the effects of sex, age, body mass index (BMI) and smoking on [ $^{11}\text{C}$ ]carfentanil binding potential. We also examined hemispheric lateralization of MOR availability. Age had regionally specific effects on MOR availability, with age-dependent increase in frontotemporal areas but decrease in amygdala, thalamus, and nucleus accumbens. The age-dependent increase was stronger in males. MOR availability was globally lowered in smokers but independent of BMI. Finally, MOR availability was higher in the right versus the left hemisphere. The presently observed variation in MOR availability may explain why some individuals are prone to develop MOR-linked pathological states, such as chronic pain or psychiatric disorders.

# *Individual differences in the $\mu$ -opioid receptor system*

## **Introduction**

Endogenous opioids modulate multiple physiological and homeostatic functions. The most studied opioid receptors are  $\mu$ -opioid receptors (MORs), which are widely expressed in the central nervous system (CNS) acting as important mediators for analgesia and reward<sup>1</sup>. Endogenous opioids also regulate mood<sup>2</sup>, social behavior<sup>3</sup> and endocrine function<sup>4, 5</sup>. Dysregulation of the MOR system has been documented in disorders including major depression<sup>6, 7</sup>, schizophrenia<sup>8</sup>, post-traumatic stress disorder<sup>9</sup>, drug addiction<sup>10</sup> and obesity<sup>11</sup>.

Opioid receptor density varies substantially between healthy humans<sup>12, 13</sup>, and this variation may contribute to etiology of different psychiatric conditions as well as treatment responses. First, a polymorphism in the MOR-coding gene OPRM1 influences cerebral MOR availability<sup>14</sup>. Second, one positron emission tomography (PET) study suggests that age and sex explain some of this variation: MOR availability increases with advancing age in cortical areas, whereas women have higher MOR availability compared to men during the reproductive years<sup>15</sup>. Third, lifestyle choices and health-related behaviour also affect the MOR system: Morbidly obese individuals have globally downregulated MORs<sup>11</sup>, and smoking has been associated with altered MOR availability<sup>16-18</sup>. However, interpretation of these effects is complicated by small sample sizes (typically 20–40) in neuroreceptor PET studies.

Poor replicability of neuroimaging findings has attracted attention during recent years<sup>19</sup>. Small sample size<sup>20</sup>, ubiquitous ‘researcher degrees of freedom’<sup>21</sup>, insufficient correction for multiple comparisons<sup>22</sup>, and uncertain measurements<sup>23</sup> have been identified to be among the underlying reasons. Use of larger samples<sup>19, 24</sup> and stricter thresholds for statistical significance<sup>25</sup> have been called for to solve the problem. It has also been argued that Bayesian hierarchical modeling could facilitate reproducible research by limiting the number of paths a researcher can take in their analyses<sup>26</sup> and by removing the need to correct for multiple comparisons<sup>27</sup>.

### *Individual differences in the $\mu$ -opioid receptor system*

Here we used Bayesian hierarchical modeling with varying slopes and intercepts for different brain regions to estimate the effects of sex, age, body mass index (BMI) and smoking on cerebral MOR availability, and cerebral lateralization of the MOR system in a large sample of 204 historical subjects scanned with PET using [ $^{11}\text{C}$ ]carfentanil, a highly selective MOR-agonist tracer.

# Individual differences in the $\mu$ -opioid receptor system

## Material and Methods

### Subjects

The data were retrieved from the AIVO database (<http://aivo.utu.fi>) of *in vivo* molecular images hosted by Turku PET Centre. We identified all the individuals with no neurologic or psychiatric disorders who had been scanned with [ $^{11}\text{C}$ ]carfentanil PET between 2003 and 2018 in baseline condition. The resulting data from 204 individuals consists of scans from 11 research projects and five PET scanners. No subjects abused alcohol or illicit drugs or used medications affecting the CNS. 13 females were smokers, while no males smoked. The characteristics of the subjects are summarized in Table 1. Information about the PET scanners, smoking status and handedness is summarized in Supplementary Table 1.

**Table 1.** Characteristics of the study sample.

|                                | Males (n = 132) |      |         | Females (n = 72) |       |         |
|--------------------------------|-----------------|------|---------|------------------|-------|---------|
|                                | mean            | s.d. | range   | mean             | s.d.  | range   |
| Age (years)                    | 27.8            | 8.0  | 20–58   | 40.7             | 10.3  | 20–59   |
| Weight (kg)                    | 78.0            | 9.3  | 53–110  | 76.5             | 23.5  | 47–144  |
| Height (cm)                    | 180.7           | 5.9  | 165–198 | 165.8            | 5.7   | 151–180 |
| BMI ( $\text{kg}/\text{m}^2$ ) | 23.9            | 2.7  | 18–34   | 27.8             | 8.1   | 18–49   |
| Injected activity (MBq)        | 297.2           | 93.5 | 218–533 | 341.1            | 109.0 | 199–519 |

### Image processing and binding quantification

Preprocessing of the PET data as well as its kinetic modeling were done using Magia<sup>28</sup> (<https://github.com/tkkarjal/magia>), an automated processing pipeline developed at the Turku PET Centre running on MATLAB (The MathWorks, Inc., Natick, Massachusetts, United States). The preprocessing consisted of framewise realignment and coregistration of the PET and magnetic resonance images (MRIs). Tracer binding was quantified using binding potential ( $BP_{ND}$ ), which is the ratio of specific binding to non-displaceable binding in tissue<sup>29</sup>.  $BP_{ND}$  was estimated using

## *Individual differences in the $\mu$ -opioid receptor system*

simplified reference tissue model<sup>30</sup>, with occipital cortex serving as the reference region<sup>31</sup>. Regions of interest (ROIs) and reference regions were parcellated for each subject using FreeSurfer (<http://surfer.nmr.mgh.harvard.edu/>). The bilateral ROIs consisted of MOR-rich regions: amygdala, caudate, dorsal anterior cingulate cortex, inferior temporal gyrus, insula, middle temporal gyrus, nucleus accumbens, orbitofrontal cortex, pars opercularis, posterior cingulate cortex, putamen, rostral anterior cingulate cortex, superior frontal gyrus, temporal pole, and thalamus. Parametric  $BP_{ND}$  images were also calculated for full-volume analysis. They were spatially normalized to MNI-space via segmentation of T1-weighted MRIs and smoothed with an 8-mm Gaussian kernel.

## **Statistical analysis**

### *Model specification and estimation*

Bayesian hierarchical modeling was used to estimate the effects. The models were specified using the R package BRMS<sup>32</sup> that uses the efficient Markov chain Monte Carlo sampling tools of RStan (<https://mc-stan.org/users/interfaces/rstan>). We used weakly informative priors: For intercepts, we used the default of BRMS, i.e. Student's t-distribution with scale 3 and 10 degrees of freedom. For predictors, a Gaussian distribution with standard deviation of 1 was used to provide weak regularization. The BRMS default prior half Student's t-distribution with 3 degrees of freedom was used for standard deviations of group-level effects; BRMS automatically selects the scale parameter to improve convergence and sampling efficiency. The BRMS default prior LKJ(1) was used for correlations of group-level random effects.

The ROI-level models were estimated using three chains, each of which had 2000 warmup samples and 10000 post-warmup samples, thus totaling 30000 post-warmup samples. The sampling parameters were slightly modified to facilitate convergence (*adapt\_delta* = 0.95; *max\_treedepth* = 15). The sampling produced no divergent iterations and the Rhats were all 1.0, suggesting that the chains converged successfully. Before model estimation, continuous predictors were standardized to

## *Individual differences in the $\mu$ -opioid receptor system*

have zero mean and unit variance, thus making the regression coefficients comparable across the predictors. The scripts used for analyzing the data are available in <https://github.com/tkkarjal/mor-variability>.

### *Model comparison*

We specified seven linear models with varying slopes and intercepts for the ROIs (Supplementary Figure 1). All models included subject-specific intercepts to control for variables not explicitly included in the models and dummy-covariates to control for biases between different scanners. The first model included all variables of interest (sex, age, BMI, and smoking) and sex-interactions for age and BMI; sex-smoking interaction could not be estimated because all smokers were female. The remaining models were submodels of the first model. Binding potentials were log-transformed because posterior predictive checking<sup>33, 34</sup> indicated that log-transformation significantly improves model fit (see Supplementary Figure 2). The log-transformation essentially switches the model from additive to multiplicative; it also helps in model fitting because the assumption of linear additivity works poorly when the dependent variable is restricted to positive values<sup>35</sup>.

Predictive performance of the seven models was compared using Bayesian 10-fold cross-validation<sup>36</sup>, as implemented in the R package LOO (<https://CRAN.R-project.org/package=loo>). The subsamples used in cross-validation were created by randomly removing 10 % of the subjects. Predictive accuracy was then assessed for the leftover subjects. This procedure was repeated ten times, and the results were combined to select a model. According to the cross-validation criterion, the model without BMI (Model 4) had the best predictive accuracy, outperforming the other models significantly (Supplementary Table 2). BMI was thus not a relevant predictor of MOR availability. The posterior distribution obtained using the Model 4 (without BMI) is more closely investigated in the Results section.

### *Full-volume analyses*

### *Individual differences in the $\mu$ -opioid receptor system*

Traditional voxel-level analysis with Bayesian hierarchical modeling was inappropriate for the whole-brain analysis: With typically used voxel sizes (isotropic 1–6 mm) the number of voxels was so large that model estimation was computationally prohibitive. In turn, when downsampling the data to resolution whose analysis was computationally feasible (isotropic 10 mm), the resulting voxels extended over functionally heterogeneous tissue causing partial volume effects. We thus developed a new method for receptor-density-based subdivision of anatomical regions. The method clusters atlas-derived anatomical ROIs into smaller volumetric units based on the spatial receptor-density distribution within each ROI. Here the anatomical ROIs were defined using the AAL template, and the clustering was based on a high-resolution population [ $^{11}\text{C}$ ]carfentanil  $BP_{ND}$  map (i.e. average of all parametric  $BP_{ND}$  images analyzed in the study; see Figure 1). Hierarchical clustering, as implemented in MATLAB, was used (see <https://github.com/tkkarjal/mor-variability> for the code). The procedure makes the receptor availability of the clusters homogenous within clearly defined anatomical boundaries while keeping the number of volumetric units within computationally feasible limits (here 320). Once the clusters were defined, we calculated cluster-specific binding potentials for each subject, and fitted the Model 4 to the data, thus essentially estimating the effects in the whole brain.

### *Hemispheric asymmetry*

Hemispheric asymmetry was analyzed by comparing within-subject differences in binding potentials between the hemispheres. We first calculated the difference between the ROI-specific right and left hemisphere estimates. We then modeled these differences using ROI-specific intercepts using the default priors of BRMS. The effects were calculated separately for males and females.



# *Individual differences in the $\mu$ -opioid receptor system*

## Results

In both sexes, MORs were widely expressed in the brain (Figure 1), consistent with previous studies<sup>37</sup>.

Unthresholded atlases of average receptor densities for males, females and the whole sample are

available at <https://neurovault.org/collections/GCELSAIA/>.

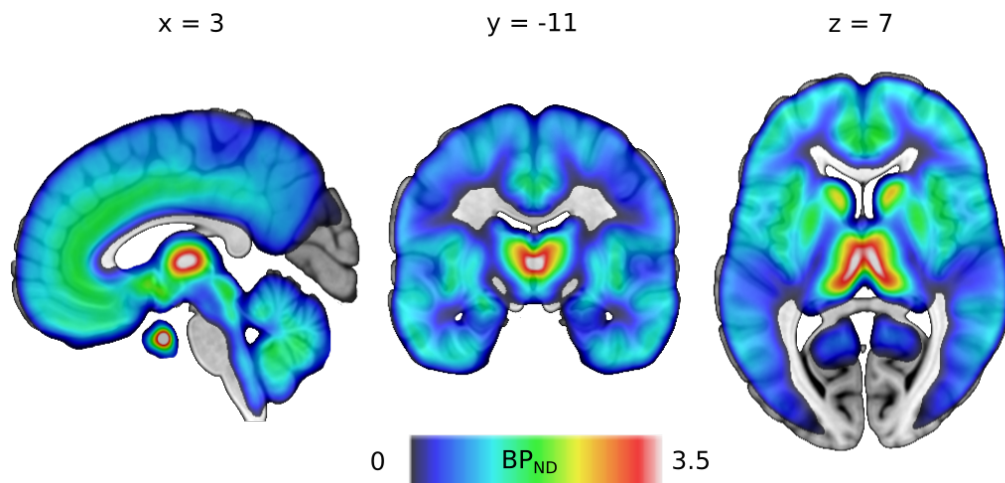

Figure 1. Mean distribution of  $\mu$ -opioid receptors in the human brain based on the 204 [ $^{11}\text{C}$ ]carfentanil  $BP_{ND}$  images.

## *Individual differences in the $\mu$ -opioid receptor system*

### **Effects of age and sex**

We observed regionally varying effects of age on MOR availability across both sexes (Figure 2). MOR availability decreased with ageing in amygdala, thalamus, nucleus accumbens, and cerebellum, whereas it increased with ageing in temporal regions and frontal cortex. The positive associations were stronger in males. In males, MOR availability increased with age also subcortically in putamen and insula. The proportional changes of  $BP_{ND}$  as a result of ageing 10.8 years (one standard deviation of the sample's age distribution) on MOR availability in the ROIs are presented in Supplementary Table 3. Age-dependent sex-differences in MOR availability are visualized in Figure 3. In almost all ROIs, the mean MOR availability was higher in 20-year-old females compared to 20-year-old males (Supplementary Table 3). Because MOR availability increased with age in males faster than in females, the sex-differences decreased until around 30 years of age, after which MOR availability in males increased above females in most brain regions. Amygdala, thalamus, nucleus accumbens, and temporal pole displayed no notable sex differences at any age.

# Individual differences in the $\mu$ -opioid receptor system

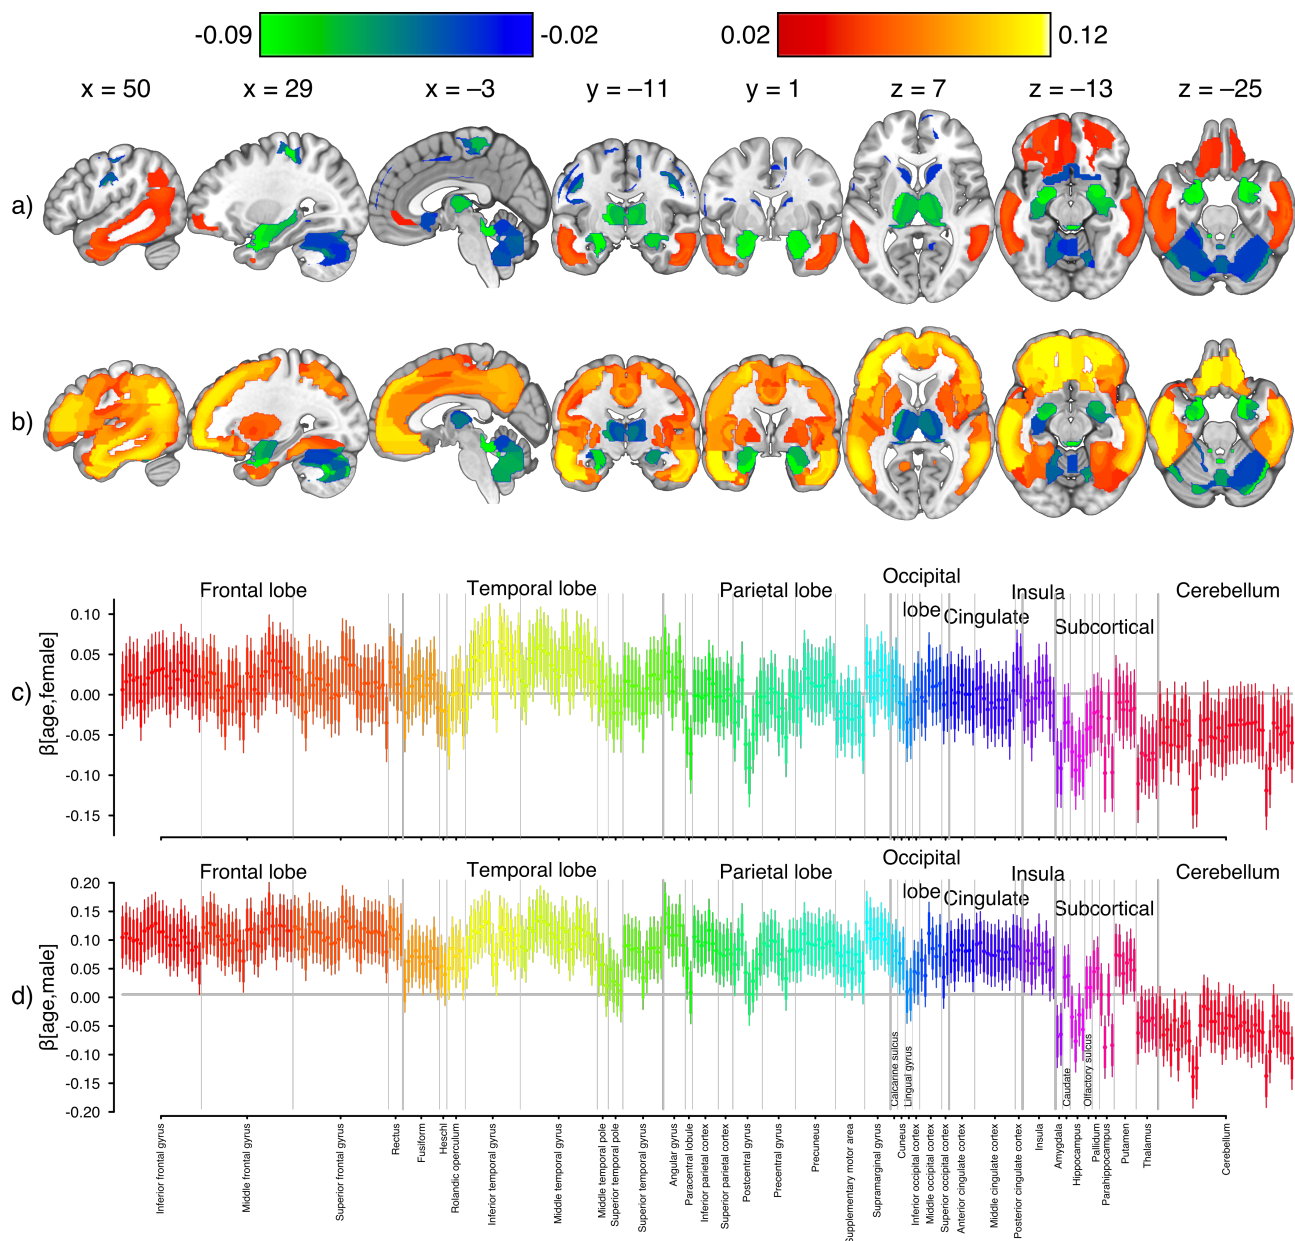

Figure 2. Effects of age and sex on  $\mu$ -opioid receptor (MOR) availability in the brain. (a-b) Brain regions where MOR availability is associated with age in females (a) and males (b). Shown clusters have 80 % posterior interval excluding zero and absolute value of the regression coefficient at least 0.02. Colouring indicates increase (hot colours) and decrease (cool colours) of MOR availability as a function of ageing. Unthresholded maps are available at <https://neurovault.org/collections/GCELSAIA/>. (c-d) Summary of the posterior distributions of all clusters for the regression coefficient of age for females (c) and males (d). The filled circles represent

# Individual differences in the $\mu$ -opioid receptor system

posterior means, the thick lines 80 % posterior intervals, and the thin lines 95 % posterior intervals.

Colour coding is used for highlighting the anatomical grouping of the clusters (see labels on x-axis).

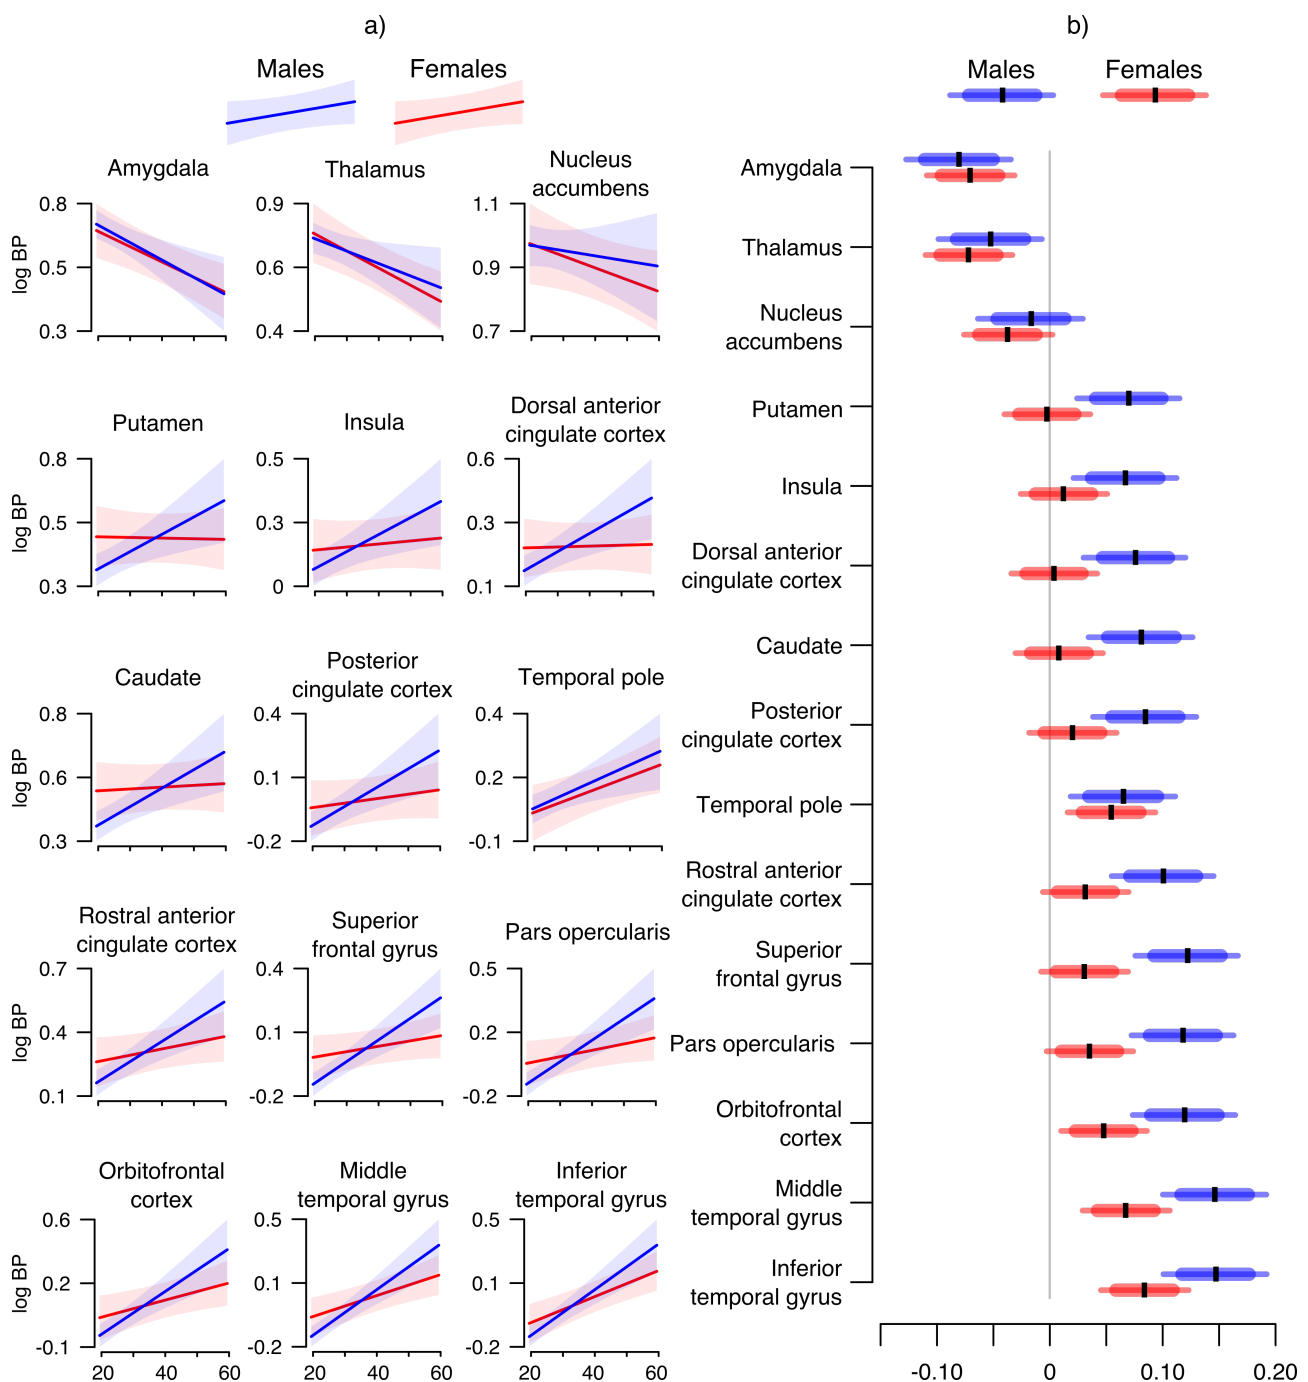

Figure 3. Sex-dependent ageing effects. (a) Age-dependent mean log binding potential along with 95 % highest density posterior intervals calculated over the range of data points for all regions of interest separately for males (blue) and females (red). (b) Posterior intervals of the regression coefficients of age for males (blue) and females (red). The black vertical lines represent posterior means, the thick

## *Individual differences in the $\mu$ -opioid receptor system*

horizontal bars 80 % posterior intervals, and the thin horizontal bars 95 % posterior intervals. The data are sorted by posterior means.

We also explored nonlinear effects of age on MOR availability in the ROIs (Supplementary Figure 3). These analyses confirmed that MOR availability decreases linearly in amygdala and thalamus, and the increase in MOR availability is steeper in males compared to females in most brain regions. In males, however, the increase was linear only until approximately 30 years of age, after which it slowed down and saturated by 50 years of age. In temporal and frontal cortices, also females exhibited similar nonlinear age-effects.

## **Effects of smoking**

Smokers had globally lowered binding compared to nonsmokers (Supplementary Figure 4). The reductions, ranging from 8 % to 14 % (Supplementary Table 3), were most prominent in subcortical regions such as amygdala and striatum. Because all the smokers were female, we also estimated the effects of smoking using female-only data. This analysis yielded similar results.

## **Hemispheric asymmetry**

The posterior distributions for absolute differences between regional binding potentials in the right and left hemispheres are presented in Figure 4. All differences were within  $\pm 6$  % (Supplementary Table 4). In most brain regions, including thalamus, caudate, cingulate cortex, orbitofrontal cortex, and putamen, MOR availability was higher in the right hemisphere. Only in nucleus accumbens and amygdala was MOR availability higher in the left hemisphere. This lateralization was consistent across the sexes. We also examined hemispheric differences in subsamples of the 128 right-handed and the seven left-handed individuals, and found that both groups display lateralization towards the right hemisphere.

# Individual differences in the $\mu$ -opioid receptor system

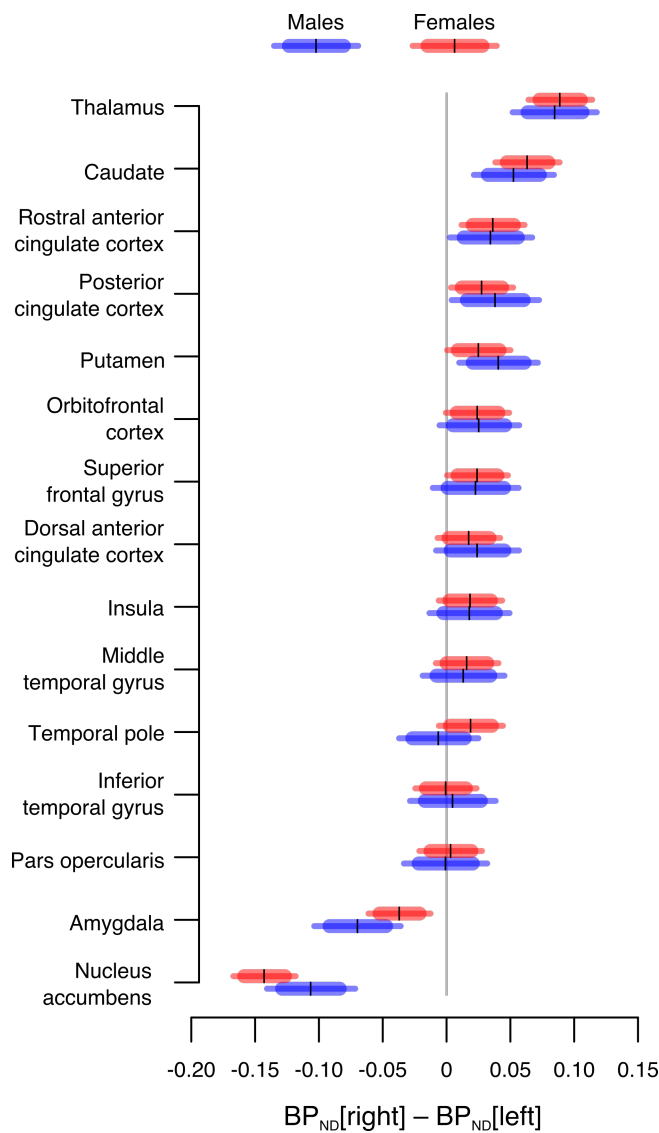

Figure 4. Posterior distribution of hemispheric differences estimated in each region separately for females (red) and males (blue). Distributions located right to the dashed line have higher binding in the right hemisphere and vice versa. The black vertical lines represent posterior means, the thick horizontal bars 80 % posterior intervals, and the thin horizontal bars 95 % posterior intervals.

## *Individual differences in the $\mu$ -opioid receptor system*

### **Discussion**

Our main findings were that sex, age, and smoking influence [ $^{11}\text{C}$ ]carfentanil binding potential in the brain. BMI was not associated with MOR availability. In most brain regions, MOR availability was slightly higher in the right than in the left hemisphere.

#### **Effects of age on endogenous opioid system**

Effects of ageing on MORs were regionally dependent. In both sexes, advancing age was associated with reductions in [ $^{11}\text{C}$ ]carfentanil  $BP_{ND}$  in thalamus, amygdala, nucleus accumbens, and cerebellum. On the contrary, MOR availability in frontotemporal areas increased with age in both sexes. Nonlinear models revealed that this upregulation reaches a plateau at around 40–50 years of age. The age-related increase in cortical MOR availability is consistent with previous data from autoradiography studies<sup>12, 13, 38</sup>. Also, the only prior PET study that has investigated effects of ageing on MOR availability in a significantly smaller sample reported positive association in cortical areas<sup>15</sup>. Our data thus support cortical increase of MOR availability with advancing age, but highlight that the increase saturates at some point and that the effect is reversed in some brain structures.

The age-related decrease in MOR availability observed in thalamus, amygdala and nucleus accumbens is consistent with the general pattern of ageing-related brain atrophy, emerging as reduced cortical thickness and reduced grey and white matter volume<sup>39</sup>. Many other receptor systems, including serotonergic and dopaminergic systems, undergo receptor loss with advancing age<sup>40, 41</sup>. The decrease in MOR availability likely reflects similar receptor loss. This may have implications for chronic pain. In PET studies, fibromyalgia and central neuropathic pain are associated with reduced opioid receptor availability in nucleus accumbens, amygdala and thalamus<sup>42, 43</sup>. These brain regions also display enhanced opioidergic processing during acute pain<sup>44</sup>. Age-related reduction in MOR density in these pain modulatory brain regions could thus reflect lowered pain-attenuation capacity, possibly explaining some of the increased prevalence of pain disorders among the elderly<sup>45</sup>.

## *Individual differences in the $\mu$ -opioid receptor system*

While consistent with prior findings, the age-related *increase* in cortical MOR availability is in contrast with the age-related neural atrophy. The increase in MOR availability likely reflects increase in receptor density, as data from rodents indicates that MOR density increases with age<sup>46</sup>, and human autoradiography studies suggest that the age-related increase in cortical MOR availability results from increased receptor density rather than affinity<sup>12, 13</sup>. As ageing also results in decreased endogenous opioid concentration in rodent CNS<sup>47</sup>, it is possible that the receptors are upregulated to compensate for the decreased endogenous opioid drive<sup>48</sup>.

## **Sex differences in $\mu$ -opioid receptor availability**

Regional effects of ageing on MOR were stronger in males, and also observed more widely in the brain than in females. Previously, two PET studies have investigated sex differences in cerebral MOR availability. Data from the first study suggest that during their reproductive years females have higher MOR availability than males in thalamus, caudate, and amygdala, but that the difference disappears or reverses after menopause<sup>15</sup>. In the second study with age-matched 40-year-old participants, males had higher MOR availability in cingulate cortex and ventral striatum<sup>49</sup>. The present large-scale dataset suggests that the sex difference in MOR availability is actually *reversed* during ageing: In the reproductive age women have higher MOR availability than men in multiple brain regions, whereas older males have higher MOR availability in cortical and most subcortical areas.

These sex differences might be linked with gonadal steroids: In rodents, subcutaneous injection of estrogen increases MOR mRNA levels in the CNS<sup>50</sup>. Human studies have shown that in females the estrogen-state influences MOR availability in thalamus, amygdala and nucleus accumbens<sup>51</sup>. Menopause and the associated low-estrogen state in ageing females might thus explain some of the observed sex differences. Also in males, the estrogen-to-testosterone ratio increases with age<sup>52</sup>, and the elevated estrogen tone might in turn upregulate the MOR system.



## *Individual differences in the $\mu$ -opioid receptor system*

In some brain regions, the age-dependencies were nonlinear. In males, MOR availability increased rapidly between the ages 20 and 30, after which the increase slowed down and plateaued at around 40–50 years. Similar saturation pattern was observed in females in frontal and temporal cortices. These data indicate that the linear sex-interactions that were observed in temporal cortex could result from differences in the age distributions rather than from biological sex differences. Elsewhere in the brain, the steeper increase of MOR availability in males is more likely to be of biological origin.

## **Smoking and endogenous opioid system**

We found that smokers had globally lowered MOR availability. The effect was particularly large in striatum, insula and amygdala. MOR availability reductions in smokers have been previously documented in many brain areas, including anterior cingulate cortex, thalamus, amygdala, insula and striatum<sup>16, 17</sup>. Our data confirm these reductions. Nicotine administration induces release of endogenous opioids<sup>53</sup>, a mechanism that presumably underlies nicotine-induced reward<sup>54</sup>. Regular smoking thus frequently activates the endogenous opioid system, and our data suggest that it leads to downregulation of MORs, possibly to prevent overactivation of the MOR system.

## **Body mass index in the non-obese range does not correlate with $\mu$ -opioid receptor availability**

BMI was not associated with [<sup>11</sup>C]carfentanil  $BP_{ND}$ . This was against our expectations, since MOR availability is decreased in morbidly obese subjects<sup>11, 55</sup>. Furthermore, binge eating disorder (BED) patients also have reduced MOR availability in several brain regions<sup>56</sup>. Because our subjects were mostly normal-weight, BMI may be associated with MOR only in the pathological (obese) end of the spectrum. BMI is widely used as a marker for obesity and excess fat, but it does not directly measure body composition or obesity, nor does it necessarily reflect the changes of body adiposity arising from factors such as subject's age or muscle mass<sup>57</sup>. Lowered MOR availability in the morbidly obese

## *Individual differences in the $\mu$ -opioid receptor system*

and BED patients may therefore result from pathological eating or dysfunction of the pleasure system rather than from high body mass itself.

## **Lateralization of endogenous opioid system**

We found differences of 1–5 % between the binding potentials of the two hemispheres.  $BP_{ND}$  was higher in the right than in the left hemisphere in most brain areas. Only in nucleus accumbens and amygdala  $BP_{ND}$  was lateralized to the left hemisphere. Handedness did not explain the direction of lateralization. Enkephalin levels have been observed to differ in post-mortem tissue samples from anterior cingulate cortex<sup>58</sup>, showing that opioid peptide concentrations may differ between the hemispheres, possibly explaining some of the lateralization.

Previous studies have revealed functional asymmetry in amygdala's emotion processing. Under direct electrical stimulation, right amygdala produces only negative emotions, whereas left amygdala induces both positive and negative emotions<sup>59</sup>. In PET studies, depression has been connected to lowered MOR availability in amygdala<sup>6</sup>, and acute positive mood is associated with amygdala's MOR system activation<sup>60</sup>. Amygdala has important excitatory effects on ipsilateral nucleus accumbens, facilitating motivated behaviour<sup>61</sup>. Nucleus accumbens and amygdala were the only regions where the MOR system was lateralized to the left hemisphere. MOR lateralization in amygdala and nucleus accumbens might reflect lateralization of emotion processing, the left amygdala with higher MOR availability being more responsible for emotional processes.

Thalamus showed the most prominent rightward lateralization with 5 %. Thalamus relays somatosensory and nociceptive signals to cerebral cortex<sup>62</sup>. Acute pain is associated with endogenous opioid release in thalamus, presumably to alleviate pain<sup>44</sup>. Right thalamus may be more specialized to pain processing than the left, since following a stroke and brain damage, thalamic pain syndrome develops more frequently if the thalamic lesion has been right-sided<sup>63</sup>. Our finding of increased MOR availability in the right thalamus is consistent with lateralized central pain processing.

## *Individual differences in the $\mu$ -opioid receptor system*

### **Limitations**

The primary limitation of the study is that the data were sampled from 11 distinct study projects and obtained using five different PET scanners. Even if the scanners are cross-calibrated, they may produce slightly different  $BP_{ND}$  estimates. We however corrected for potential scanner-related biases in the analyses. The available data was not ideally detailed – in females, age of the possible menopause or the phase of menstrual cycle was not recorded. Our sample had subjects with 20–60 years of age, and the conclusions may not be generalizable outside this range. We had no information about the genetic profile of our subjects, and we could thus not assess the influence of genetic factors. Furthermore, the data set was not fully representative for all subgroups of interest. For example, there were only seven confirmed left-handed subjects and 13 smokers, and all smokers were females. Another limitation is related to the concept of binding potential:  $BP_{ND}$  is the product of i) density of the target receptors unoccupied by endogenous ligands and ii) affinity of the radioligand to the receptor<sup>1, 64</sup>, and in a single PET scan it is impossible to differentiate these components. [<sup>11</sup>C]carfentanil is an agonist tracer preferably binding in MORs in the high-affinity state<sup>1</sup>. While endogenous opioids compete for binding sites with [<sup>11</sup>C]carfentanil<sup>65 66</sup>, at least in rats the basal opioid concentrations are low<sup>67</sup>. Accordingly, [<sup>11</sup>C]carfentanil  $BP_{ND}$  in baseline condition likely reflects mostly density of high-affinity MORs.

### **Conclusions**

Age, sex, and smoking influence cerebral MOR availability. Ageing was associated with decreased MOR availability in thalamus and amygdala, possibly reflecting age-associated neurodegeneration and pain burden. In temporal and frontal regions, MOR availability increased with ageing, which might reflect a compensatory process to reduced endogenous opioid concentrations. MOR availability increased with age faster in males than in females, and these sex differences may pertain

## *Individual differences in the $\mu$ -opioid receptor system*

to sex-specific hormonal modulation of MOR system. Smoking was associated with globally decreased MOR availability, likely resulting from downregulation of MORs as a consequence of continuous activation of the MOR system. Even if alterations in MOR system have been reported in obesity and binge eating, BMI was not associated with MOR availability. We found that the human MOR system manifests consistent but minor asymmetry between the two hemispheres. From experimental point of view, these data highlight that studies with [ $^{11}\text{C}$ ]carfentanil need to have well-matched, non-smoking samples and single-sex subject selection, unless sufficient statistical power for analysing sex differences can be achieved. Given the prominent effect of ageing on MORs especially before the age of 30, even small age differences between tested groups can lead to artificial group differences. Altogether, these data show that healthy humans vary significantly in their cerebral MOR availability, and that age, sex and smoking status explain a part of this variation. Variability in MOR system might be one neurobiological mechanism explaining why some individuals are more vulnerable to develop MOR-linked pathological states such as chronic pain or neuropsychiatric disorders.

## **Acknowledgements**

This study was supported by Academy of Finland (grant #294897# to LN) and Sigrid Juselius Foundation. We thank the Finnish Cultural Foundation (Southwest Finland Fund) for personal grants to T. Kantonen and T. Karjalainen, as well as State Funding for University-level Health Research given to T. Karjalainen. We also thank the Emil Aaltonen Foundation for personal grant to T. Kantonen. This article has been posted on preprint server bioRxiv (<https://www.biorxiv.org>).

## **Conflict of interest**

The authors declare no conflict of interest.

# Individual differences in the $\mu$ -opioid receptor system

## References

1. Henriksen G, Willoch F. Imaging of opioid receptors in the central nervous system. *Brain* 2008; **131**(Pt 5): 1171-1196.
2. Lutz PE, Kieffer BL. Opioid receptors: distinct roles in mood disorders. *Trends in neurosciences* 2013; **36**(3): 195-206.
3. Machin AJ, Dunbar RI. The brain opioid theory of social attachment: a review of the evidence. *Behaviour* 2011; **148**(9-10): 985-1025.
4. Katz N, Mazer NA. The impact of opioids on the endocrine system. *The Clinical journal of pain* 2009; **25**(2): 170-175.
5. Wand GS, Weerts EM, Kuwabara H, Frost JJ, Xu X, McCaul ME. Naloxone-induced cortisol predicts mu opioid receptor binding potential in specific brain regions of healthy subjects. *Psychoneuroendocrinology* 2011; **36**(10): 1453-1459.
6. Kennedy SE, Koeppe RA, Young EA, Zubieta JK. Dysregulation of endogenous opioid emotion regulation circuitry in major depression in women. *Archives of general psychiatry* 2006; **63**(11): 1199-1208.
7. Peciña M, Karp JF, Mathew S, Todtenkopf MS, Ehrich EW, Zubieta J-K. Endogenous opioid system dysregulation in depression: implications for new therapeutic approaches. *Molecular psychiatry* 2019; **24**(4): 576-587.
8. Ashok AH, Myers J, Reis Marques T, Rabiner EA, Howes OD. Reduced mu opioid receptor availability in schizophrenia revealed with [11C]-carfentanil positron emission tomographic Imaging. *Nature Communications* 2019; **10**(1): 4493.
9. Liberzon I, Taylor SF, Phan KL, Britton JC, Fig LM, Bueller JA *et al.* Altered central micro-opioid receptor binding after psychological trauma. *Biol Psychiatry* 2007; **61**(9): 1030-1038.
10. Contet C, Kieffer BL, Befort K. Mu opioid receptor: a gateway to drug addiction. *Curr Opin Neurobiol* 2004; **14**(3): 370-378.
11. Karlsson HK, Tuominen L, Tuulari JJ, Hirvonen J, Parkkola R, Helin S *et al.* Obesity is associated with decreased mu-opioid but unaltered dopamine D2 receptor availability in the brain. *J Neurosci* 2015; **35**(9): 3959-3965.
12. Gross-Isseroff R, Dillon KA, Israeli M, Biegon A. Regionally selective increases in mu opioid receptor density in the brains of suicide victims. *Brain research* 1990; **530**(2): 312-316.

# *Individual differences in the $\mu$ -opioid receptor system*

13. Gabilondo AM, Meana JJ, Garcia-Sevilla JA. Increased density of mu-opioid receptors in the postmortem brain of suicide victims. *Brain research* 1995; **682**(1-2): 245-250.
14. Weerts EM, McCaul ME, Kuwabara H, Yang X, Xu X, Dannals RF *et al.* Influence of OPRM1 Asn40Asp variant (A118G) on [11C]carfentanil binding potential: preliminary findings in human subjects. *Int J Neuropsychopharmacol* 2013; **16**(1): 47-53.
15. Zubieta JK, Dannals RF, Frost JJ. Gender and age influences on human brain mu-opioid receptor binding measured by PET. *Am J Psychiatry* 1999; **156**(6): 842-848.
16. Scott DJ, Domino EF, Heitzeg MM, Koeppe RA, Ni L, Guthrie S *et al.* Smoking modulation of mu-opioid and dopamine D2 receptor-mediated neurotransmission in humans. *Neuropsychopharmacology* 2007; **32**(2): 450-457.
17. Weerts EM, Wand GS, Kuwabara H, Xu X, Frost JJ, Wong DF *et al.* Association of smoking with mu-opioid receptor availability before and during naltrexone blockade in alcohol-dependent subjects. *Addict Biol* 2014; **19**(4): 733-742.
18. Ray R, Ruparel K, Newberg A, Wileyto EP, Loughhead JW, Divgi C *et al.* Human Mu Opioid Receptor (OPRM1 A118G) polymorphism is associated with brain mu-opioid receptor binding potential in smokers. *Proc Natl Acad Sci U S A* 2011; **108**(22): 9268-9273.
19. Poldrack RA, Baker CI, Durnez J, Gorgolewski KJ, Matthews PM, Munafò MR *et al.* Scanning the horizon: towards transparent and reproducible neuroimaging research. *Nature Rev Neurosci* 2017; **18**: 115-126.
20. Button KS, Ioannidis JPA, Mokrysz C, Nosek BA, Flint J, Robinson ESJ *et al.* Power failure: why small sample size undermines the reliability of neuroscience. *Nature Rev Neurosci* 2013; **14**: 365-376.
21. Simmons JP, Nelson LD, Simonsohn U. False-Positive Psychology: Undisclosed Flexibility in Data Collection and Analysis Allows Presenting Anything as Significant. *Psychological Science* 2011; **22**(11): 1359-1366.
22. Eklund A, Nichols TE, Knutsson H. Cluster failure: Why fMRI inferences for spatial extent have inflated false-positive rates. *Proc Natl Acad Sci U S A* 2016; **113**(28): 7900-7905.
23. Loken E, Gelman A. Measurement error and the replication crisis. *Science* 2017; **355**(6325): 584.
24. Cremers HR, Wager TD, Yarkoni T. The relation between statistical power and inference in fMRI. *PLoS One* 2017; **12**(11): e0184923.
25. Benjamin DJ, Berger JO, Johannesson M, Nosek BA, Wagenmakers EJ, Berk R *et al.* Redefine statistical significance. *Nature Human Behaviour* 2018; **2**(1): 6-10.

# *Individual differences in the $\mu$ -opioid receptor system*

26. Lindquist MA, Gelman A. Correlations and Multiple Comparisons in Functional Imaging: A Statistical Perspective (Commentary on Vul et al., 2009). *Perspectives on Psychological Science* 2009; **4**(3): 310-313.
27. Gelman A, Hill J, Yajima M. Why We (Usually) Don't Have to Worry About Multiple Comparisons. *Journal of Research on Educational Effectiveness* 2012; **5**(2): 189-211.
28. Karjalainen T, Santavirta S, Kantonen T, Tuisku J, Tuominen L, Hirvonen J *et al.* Magia: Robust automated modeling and image processing toolbox for PET neuroinformatics. *bioRxiv* 2019; 604835.
29. Innis RB, Cunningham VJ, Delforge J, Fujita M, Gjedde A, Gunn RN *et al.* Consensus nomenclature for in vivo imaging of reversibly binding radioligands. *Journal of cerebral blood flow and metabolism : official journal of the International Society of Cerebral Blood Flow and Metabolism* 2007; **27**(9): 1533-1539.
30. Lammertsma AA, Hume SP. Simplified reference tissue model for PET receptor studies. *NeuroImage* 1996; **4**(3): 153-158.
31. Frost JJ, Douglass KH, Mayberg HS, Dannals RF, Links JM, Wilson AA. Multicompartmental analysis of [<sup>11</sup>C]-carfentanil binding to opiate receptors in humans measured by positron emission tomography. *J Cereb Blood Flow Metab* 1989; **9**: 398-409.
32. Bürkner P-C. brms: An R package for Bayesian multilevel models using Stan. *Journal of Statistical Software* 2017; **80**(1): 1-28.
33. Gelman A, Carlin JB, Stern HS, Dunson DB, Vehtari A, Rubin DB. *Bayesian data analysis*. Chapman and Hall/CRC2013.
34. Gabry J, Simpson D, Vehtari A, Betancourt M, Gelman A. Visualization in Bayesian workflow. *Journal of the Royal Statistical Society: Series A (Statistics in Society)* 2019; **182**(2): 389-402.
35. Gelman A, Hill J. *Data analysis using regression and multilevel/hierarchical models*. Cambridge university press2006.
36. Vehtari A, Lampinen J. Bayesian Model Assessment and Comparison Using Cross-Validation Predictive Densities. *Neural Computation* 2002; **14**(10): 2439-2468.
37. Nummenmaa L, Tuominen L. Opioid system and human emotions. *British journal of pharmacology* 2018; **175**(14): 2737-2749.
38. Zalsman G, Molcho A, Huang Y, Dwork A, Li S, Mann JJ. Postmortem  $\mu$ -opioid receptor binding in suicide victims and controls. *Journal of Neural Transmission* 2005; **112**(7): 949-954.
39. Lockhart SN, DeCarli C. Structural imaging measures of brain aging. *Neuropsychology review* 2014; **24**(3): 271-289.



# *Individual differences in the $\mu$ -opioid receptor system*

40. Rodriguez JJ, Noristani HN, Verkhatsky A. The serotonergic system in ageing and Alzheimer's disease. *Prog Neurobiol* 2012; **99**(1): 15-41.
41. Karrer TM, Josef AK, Mata R, Morris ED, Samanez-Larkin GR. Reduced dopamine receptors and transporters but not synthesis capacity in normal aging adults: a meta-analysis. *Neurobiology of aging* 2017; **57**: 36-46.
42. Harris RE, Clauw DJ, Scott DJ, McLean SA, Gracely RH, Zubieta JK. Decreased central mu-opioid receptor availability in fibromyalgia. *J Neurosci* 2007; **27**(37): 10000-10006.
43. Jones AK, Watabe H, Cunningham VJ, Jones T. Cerebral decreases in opioid receptor binding in patients with central neuropathic pain measured by [11C]diprenorphine binding and PET. *European journal of pain (London, England)* 2004; **8**(5): 479-485.
44. Zubieta JK, Smith YR, Bueller JA, Xu Y, Kilbourn MR, Jewett DM *et al.* Regional mu opioid receptor regulation of sensory and affective dimensions of pain. *Science (New York, NY)* 2001; **293**(5528): 311-315.
45. van Hecke O, Torrance N, Smith BH. Chronic pain epidemiology and its clinical relevance. *British journal of anaesthesia* 2013; **111**(1): 13-18.
46. Petrillo P, Tavani A, Verotta D, Robson LE, Kosterlitz HW. Differential postnatal development of  $\mu$ -,  $\delta$ -and  $\chi$ -opioid binding sites in rat brain. *Developmental Brain Research* 1987; **31**(1): 53-58.
47. Barden N, Dupont A, Labrie F, Me´rand Y, Rouleau D, Vaudry H *et al.* Age-dependent changes in the  $\beta$ -endorphin content of discrete rat brain nuclei. *Brain research* 1981; **208**(1): 209-212.
48. Lesscher HM, Bailey A, Burbach JP, Van Ree JM, Kitchen I, Gerrits MA. Receptor-selective changes in mu-, delta- and kappa-opioid receptors after chronic naltrexone treatment in mice. *The European journal of neuroscience* 2003; **17**(5): 1006-1012.
49. Weerts EM, Wand GS, Kuwabara H, Munro CA, Dannals RF, Hilton J *et al.* Positron emission tomography imaging of mu- and delta-opioid receptor binding in alcohol-dependent and healthy control subjects. *Alcohol Clin Exp Res* 2011; **35**: 2162-2173.
50. Quiñones-Jenab V, Jenab S, Ogawa S, Inturrisi C, Pfaff DW. Estrogen regulation of  $\mu$ -opioid receptor mRNA in the forebrain of female rats. *Molecular Brain Research* 1997; **47**(1): 134-138.
51. Smith YR, Stohler CS, Nichols TE, Bueller JA, Koeppe RA, Zubieta JK. Pronociceptive and antinociceptive effects of estradiol through endogenous opioid neurotransmission in women. *J Neurosci* 2006; **26**(21): 5777-5785.
52. Cooke PS, Nanjappa MK, Ko C, Prins GS, Hess RA. Estrogens in male physiology. *Physiological reviews* 2017; **97**(3): 995-1043.



# *Individual differences in the $\mu$ -opioid receptor system*

53. Davenport KE, Houdi AA, Van Loon GR. Nicotine protects against mu-opioid receptor antagonism by beta-funaltrexamine: evidence for nicotine-induced release of endogenous opioids in brain. *Neuroscience letters* 1990; **113**(1): 40-46.
54. Walters CL, Cleck JN, Kuo YC, Blendy JA. Mu-opioid receptor and CREB activation are required for nicotine reward. *Neuron* 2005; **46**(6): 933-943.
55. Burghardt PR, Rothberg AE, Dykhuis KE, Burant CF, Zubieta JK. Endogenous Opioid Mechanisms Are Implicated in Obesity and Weight Loss in Humans. *J Clin Endocrinol Metab* 2015; **100**(8): 3193-3201.
56. Majuri J, Joutsa J, Johansson J, Voon V, Alakurtti K, Parkkola R *et al.* Dopamine and Opioid Neurotransmission in Behavioral Addictions: A Comparative PET Study in Pathological Gambling and Binge Eating. *Neuropsychopharmacology* 2017; **42**(5): 1169-1177.
57. Prentice AM, Jebb SA. Beyond body mass index. *Obesity Reviews* 2001; **2**(3): 141-147.
58. Watanabe H, Fitting S, Hussain MZ, Kononenko O, Iatsyshyna A, Yoshitake T *et al.* Asymmetry of the endogenous opioid system in the human anterior cingulate: a putative molecular basis for lateralization of emotions and pain. *Cereb Cortex* 2015; **25**(1): 97-108.
59. Lanteaume L, Khalfa S, Regis J, Marquis P, Chauvel P, Bartolomei F. Emotion induction after direct intracerebral stimulations of human amygdala. *Cereb Cortex* 2007; **17**(6): 1307-1313.
60. Koeppe MJ, Hammers A, Lawrence AD, Asselin MC, Grasby PM, Bench CJ. Evidence for endogenous opioid release in the amygdala during positive emotion. *NeuroImage* 2009; **44**(1): 252-256.
61. Stuber GD, Sparta DR, Stamatakis AM, van Leeuwen WA, Hardjoprajitno JE, Cho S *et al.* Excitatory transmission from the amygdala to nucleus accumbens facilitates reward seeking. *Nature* 2011; **475**(7356): 377-380.
62. Herrero MT, Barcia C, Navarro JM. Functional anatomy of thalamus and basal ganglia. *Child's nervous system : ChNS : official journal of the International Society for Pediatric Neurosurgery* 2002; **18**(8): 386-404.
63. Nasreddine ZS, Saver JL. Pain after thalamic stroke. *Neurology* 1997; **48**(5): 1196.
64. Mintun MA, Raichle ME, Kilbourn MR, Wooten GF, Welch MJ. A quantitative model for the in vivo assessment of drug binding sites with positron emission tomography. *Annals of neurology* 1984; **15**(3): 217-227.
65. Quelch DR, Katsouri L, Nutt DJ, Parker CA, Tyacke RJ. Imaging Endogenous Opioid Peptide Release with [<sup>11</sup>C]Carfentanil and [<sup>3</sup>H]Diprenorphine: Influence of Agonist-

*Individual differences in the  $\mu$ -opioid receptor system*

Induced Internalization. *Journal of Cerebral Blood Flow & Metabolism* 2014; **34**(10): 1604-1612.

66. Saanijoki T, Tuominen L, Tuulari JJ, Nummenmaa L, Arponen E, Kalliokoski K *et al.* Opioid Release after High-Intensity Interval Training in Healthy Human Subjects. *Neuropsychopharmacology* 2018; **43**(2): 246-254.
67. Maidment NT, Brumbaugh DR, Rudolph VD, Erdelyi E, Evans CJ. Microdialysis of extracellular endogenous opioid peptides from rat brain in vivo. *Neuroscience* 1989; **33**(3): 549-557.
